# Supplementary material for: Interrogating the Effects of Hydrogen on the Behavior of Planar Deformation Bands in Austenitic Stainless Steel
Source: Springer Nature journal article supplement (doi:10.1007/s11661-021-06170-3), 2021-02-27
Supplement: MOESM1 [file 18909952]

**Supplementary Material for:**

**Interrogating the Effects of Hydrogen on the Behavior of**

**Planar Deformation Bands in Austenitic Stainless Steel**

J.E.C. Sabisch\*, J.D. Sugar, J.Ronevich, C. San Marchi, D.L. Medlin

Sandia National Laboratories, Livermore, CA 94551

\*Present Affiliation: University of Oklahoma

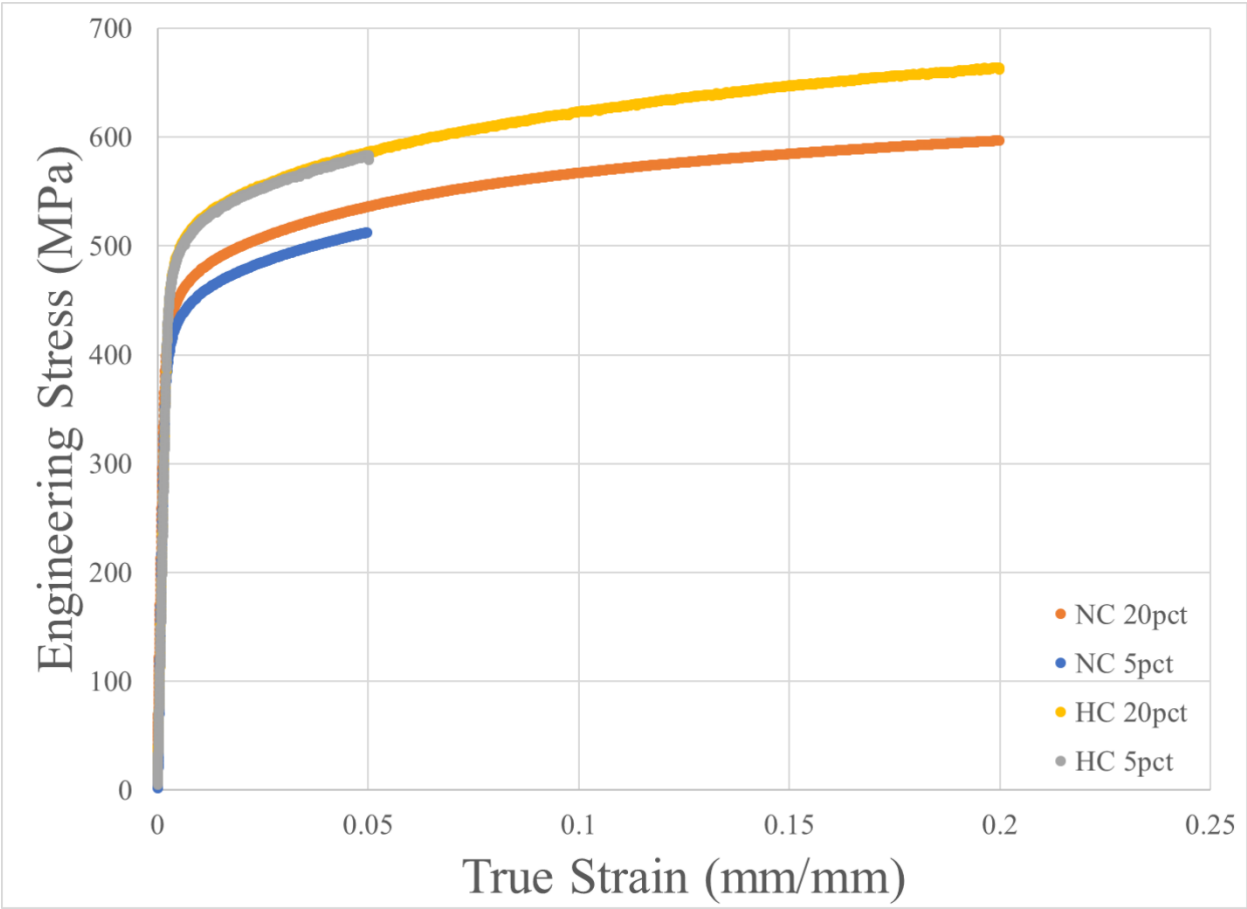

**Fig. S-1:** Stress-strain curves for the samples used in this study. The yield strength is increased appreciably in samples containing internal hydrogen.

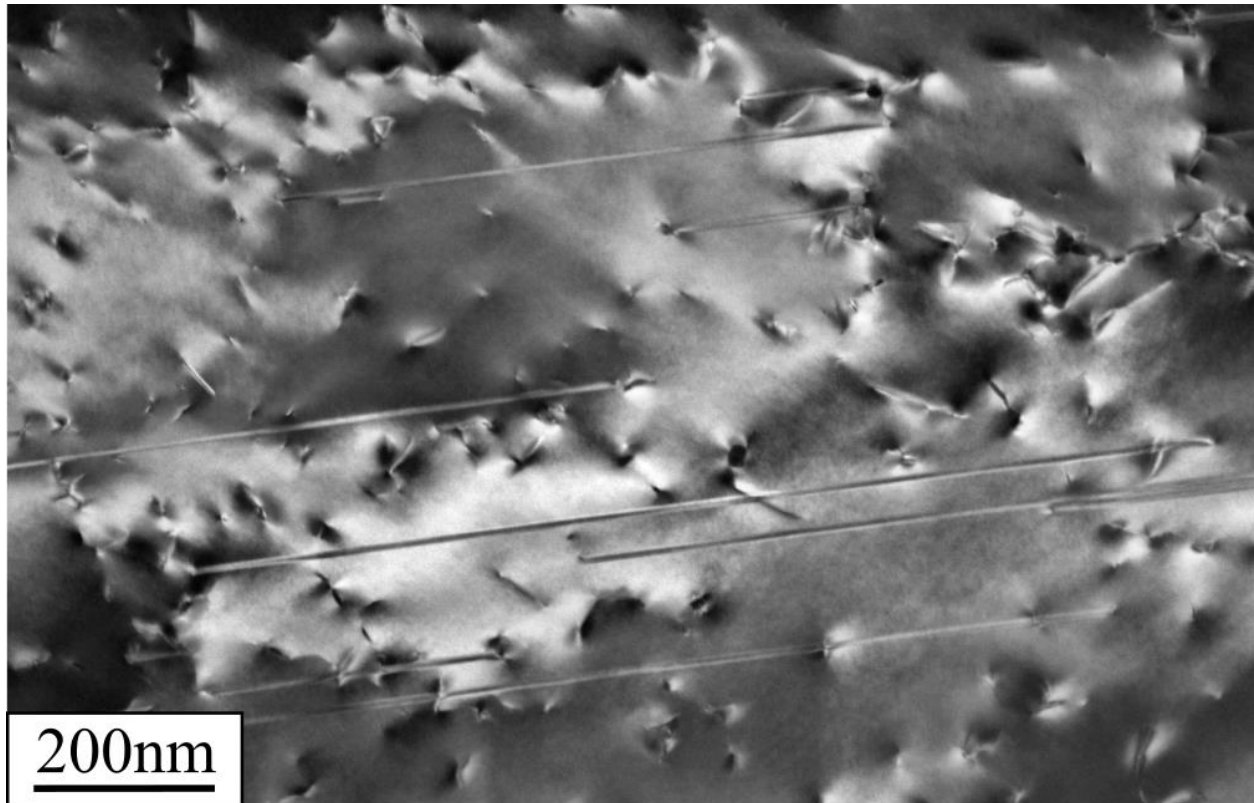

**Fig. S-2:** High magnification of stacking faults observed within the as-forged HC microstructure. Stacking faults terminate at the crystallographically required  $\frac{1}{6}\langle 112 \rangle$  dislocations (as determined in  $\vec{g} \cdot \vec{b}$  analysis in Figure 3), indicating that these SF arise from the separation of partials located within the heavily deformed forged microstructure.

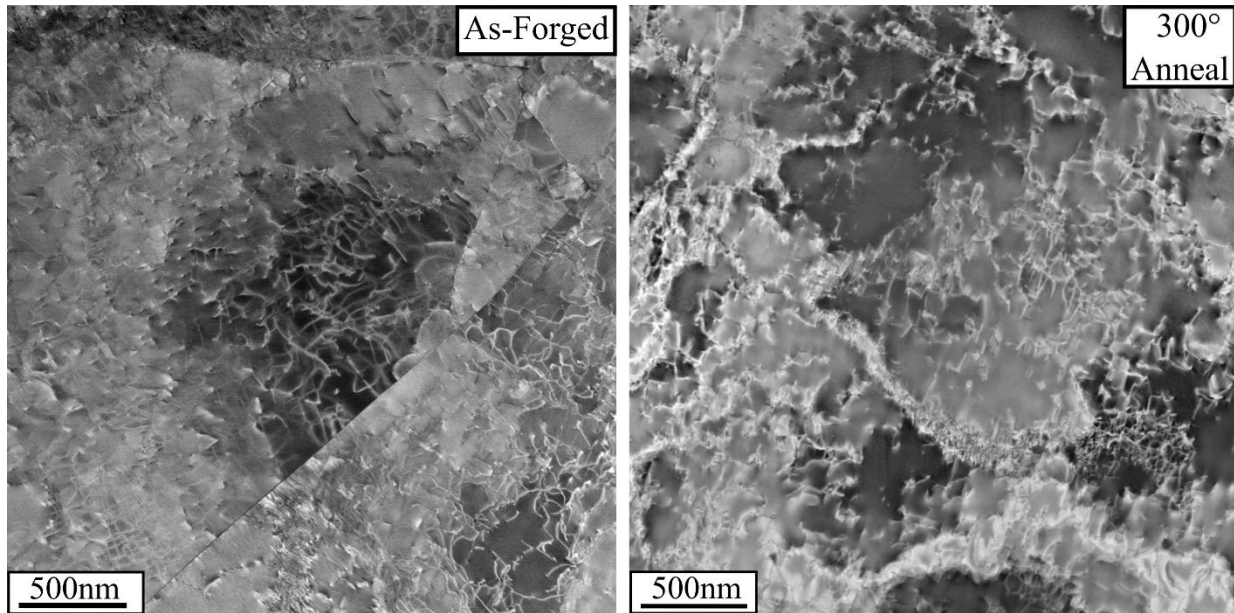

**Fig. S-3:** Comparison of NC material which has been subjected to the 300°C 1 week anneal, and the as-forged material without any additional heat treatment used in the NC tensile tests of supplementary Fig. S-1. Note the lack of any appreciable change of the dislocation microstructure or the formation of stacking faults.

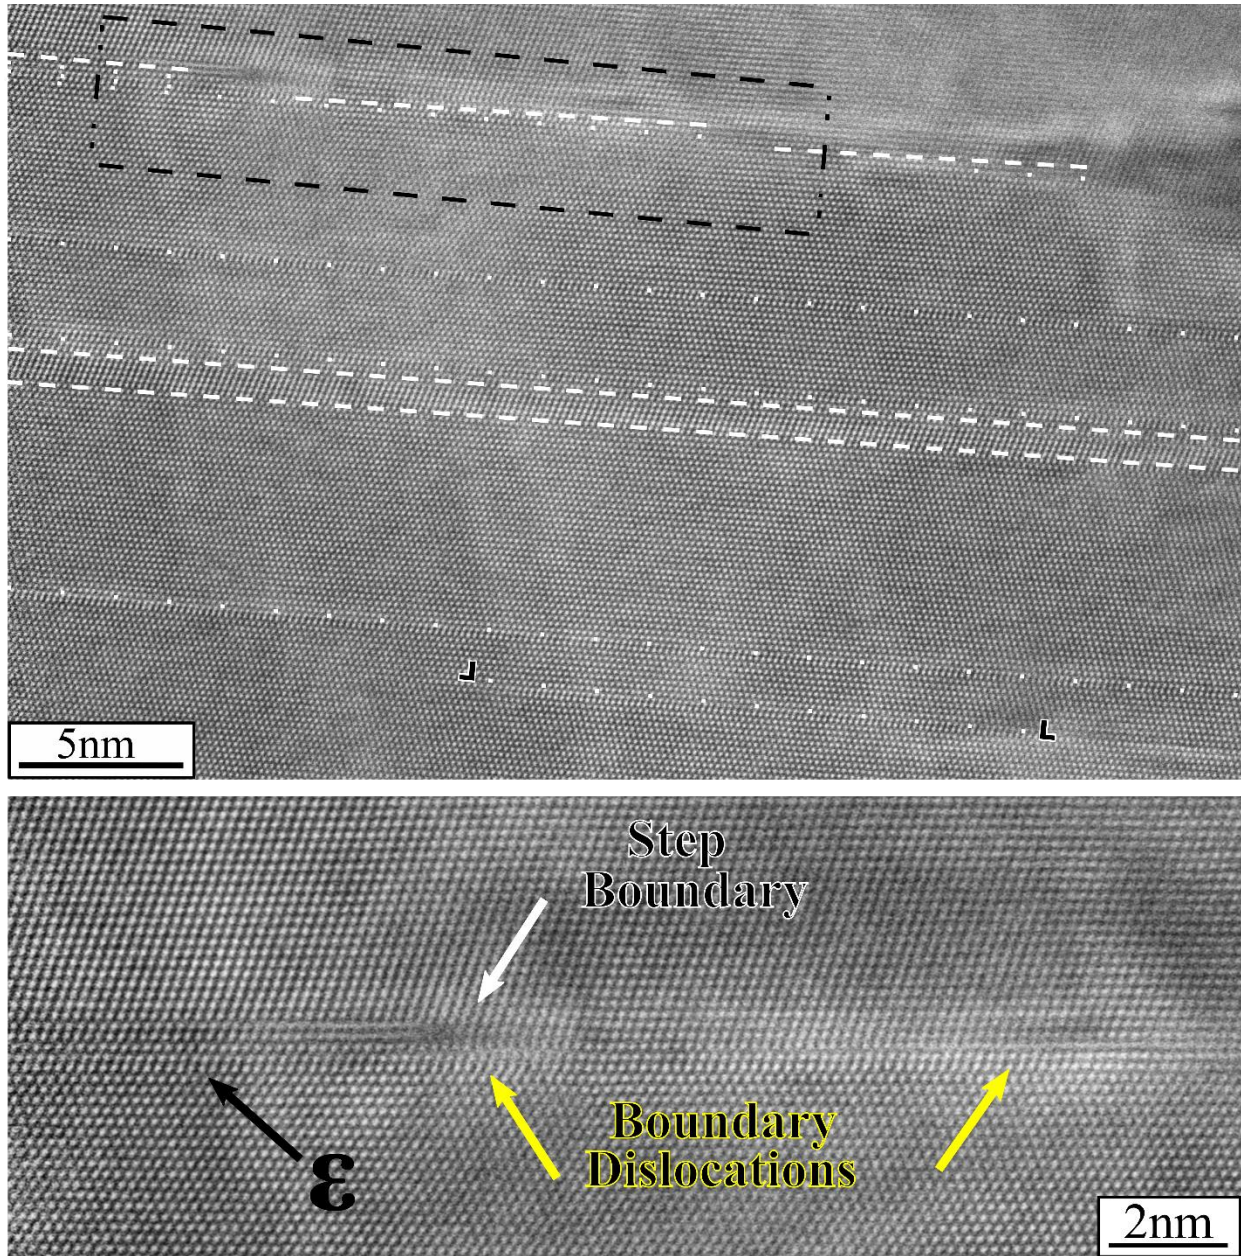

**Fig. S-4:** HRSTEM images taken from the 20% Strained NC sample of Figure 8 (top) with magnified image from the black box on bottom. A stepped twin boundary (white arrow) containing  $\epsilon$ -martensite (black arrow), and a  $\frac{1}{3}[\bar{1}1\bar{1}]$  sessile dislocation (left yellow arrow), and a  $\frac{1}{2}[\bar{1}0\bar{1}]$  lattice dislocation (right yellow arrow) along the boundary can also be observed. The  $\epsilon$ -martensite present along the twin boundary is only a few atomic planes thick. Boundary  $\epsilon$ -martensite has only been observed at 20% true strains in NC specimens, and not in the 5% NC specimen.
